# Supplementary material
Source: PubMed Central journal article supplement (PMC3492761)
Supplement: NIHMS411891-supplement-1_si_001.pdf [file NIHMS411891-supplement-1_si_001.pdf]

## Supporting Information

### Development of Oseltamivir Phosphonate Congeners as Anti-Influenza Agents

Ting-Jen R. Cheng,<sup>1</sup> Steven Weinheimer,<sup>2</sup> E. Bart Tarbet,<sup>3</sup> Jia-Tsong Jan,<sup>1</sup> Yih-Shyun E. Cheng,<sup>1</sup> Jiun-Jie Shie,<sup>1</sup> Chun-Lin Chen,<sup>4</sup> Chih-An Chen,<sup>4</sup> Wei-Che Hsieh,<sup>4</sup> Pei-Wei Huang,<sup>5</sup> Wen-Hao Lin,<sup>5</sup> Shi-Yun Wang,<sup>1</sup> Jim-Min Fang,<sup>1,4,\*</sup> Oliver Yoa-Pu Hu,<sup>5,\*</sup> and Chi-Huey Wong<sup>1,\*</sup>

<sup>1</sup> The Genomics Research Center, Academia Sinica, No. 128, Sec. 2, Academia Road, Taipei 11529, Taiwan.

<sup>2</sup> TaiMed Biologics, 5251 California Avenue, Suite 230, Irvine, CA 92617, United States.

<sup>3</sup> Institute for Antiviral Research, Department of Animal, Dairy and Veterinary Sciences, Utah State University, Logan, Utah 84322, United States.

<sup>4</sup> Department of Chemistry, National Taiwan University, No. 1, Sec. 4, Roosevelt Rd., Taipei 106, Taiwan.

<sup>5</sup> School of Pharmacy, National Defense Medical Center, No. 161, Sec. 6, Minquan E. Rd., Taipei 114, Taiwan.

To whom correspondence should be addressed. J. M. Fang, Tel: 8862-3366-1663. Fax: 8862-2363-7812. E-mail: jmfang@ntu.edu.tw. O. Y.-P. Hu, Tel: 8862-8792-3100 ext 18207. Fax: 8862-8792-4859. E-mail: hyp@ndmctsgh.edu.tw. C.-H. Wong, Tel: 8862-2789-9400. Fax 8862-2785-3852. E-mail: chwong@gate.sinica.edu.tw.

| Contents                                                                                                                                               | Page number |
|--------------------------------------------------------------------------------------------------------------------------------------------------------|-------------|
| <b>Figure s1.</b> Stability tests.                                                                                                                     | S2          |
| <b>Figure s2.</b> Plasma concentration–time curves after i.v. and oral administration of compounds in normal saline to male rats.                      | S3          |
| <b>Figure s3.</b> Plasma concentration–time curves after i.v. and oral administration of compounds in normal saline to male mice.                      | S4          |
| <b>Table s1.</b> In vitro metabolic stabilities of compounds in liver microsomes from various species.                                                 | S5          |
| <b>Table s2.</b> Protein binding of <b>4c</b> in plasma from various species.                                                                          | S5          |
| <b>Table s3.</b> Recovery of <b>4c</b> and <b>4a</b> from urine and feces after administration of compound <b>4c</b> (5 mg/kg) to Sprague–Dawley rats. | S6          |
| <b>Table s4.</b> Clinical observation on treatment of mice with compounds.                                                                             | S6          |
| <sup>1</sup> H, <sup>13</sup> C and <sup>31</sup> P NMR spectra                                                                                        | S7–S19      |

(A)

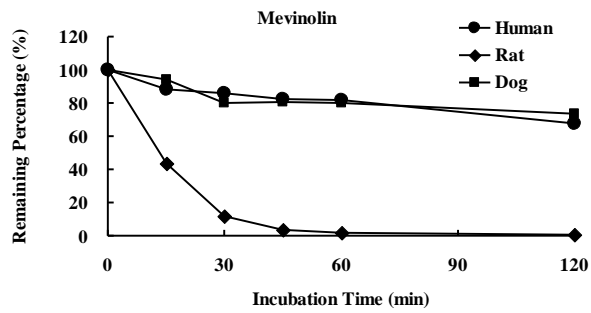

(B)

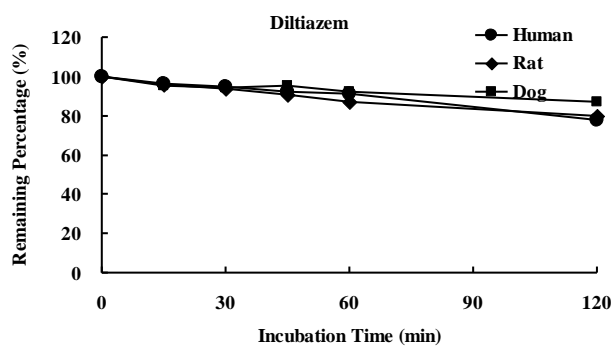

(C)

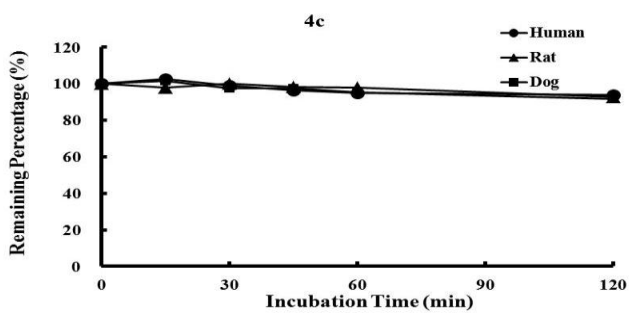

**Figure s1.** Stability tests. The stability results of control compounds, mevinolin (A) and diltiazem (B), were acceptable. Guanidino-tamiphosphor monoethyl ester **4c** (C) was stable in human, rat and dog whole blood.

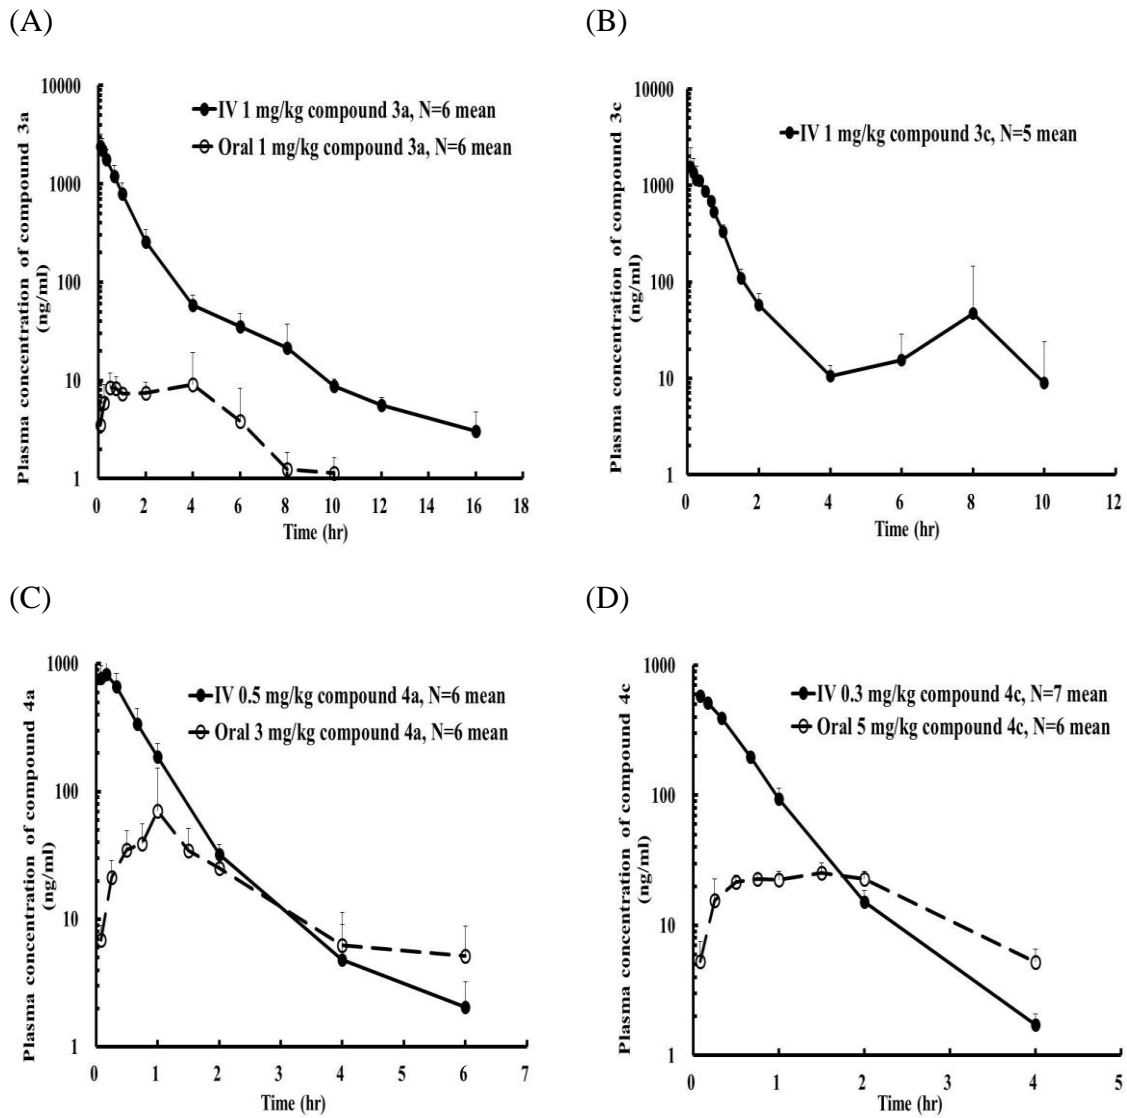

**Figure s2.** Plasma concentration–time curves after i.v. and oral administration of compounds in normal saline to male rats: (A) **3a**, (B) **3c**, (C) **4a**, and (D) **4c**.

(A)

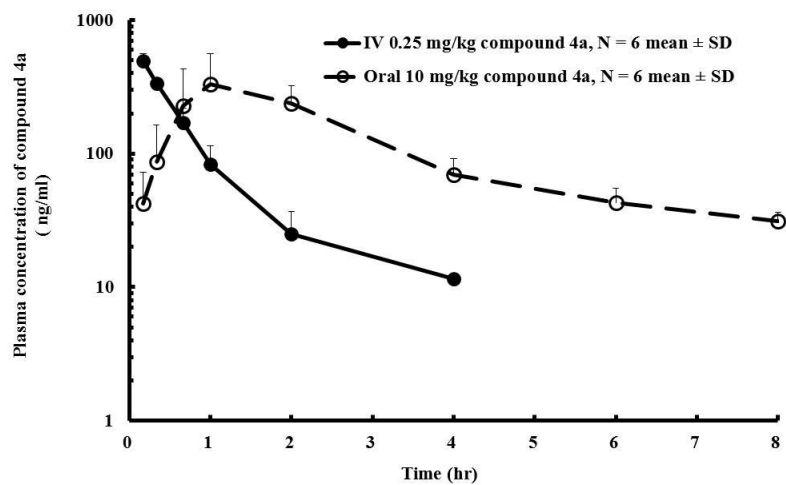

(B)

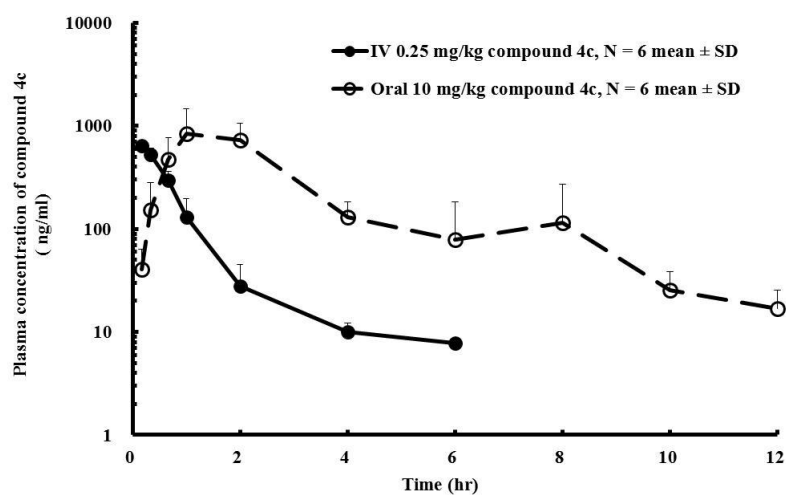

**Figure s3.** Plasma concentration–time curves after i.v. and oral administration of compounds in normal saline to male mice: (A) **4a** and (B) **4c**.

**Table s1.** In vitro metabolic stabilities of **4c** and control compounds (testosterone and midazolam) in liver microsomes from various species.

(A) Remaining % at 60 min

|                   | <b>4c</b> | Testosterone | Midazolam |
|-------------------|-----------|--------------|-----------|
| HLM <sup>a</sup>  | 96.62     | 35.01        | 10.91     |
| MRLM <sup>a</sup> | 92.54     | 0.33         | 1.74      |
| MDLM <sup>a</sup> | 104.68    | 11.34        | 1.3       |

(B) Intrinsic clearance (CL<sub>int</sub>) (μL/min/mg proteins)

|                   | <b>4c</b> | Testosterone | Midazolam |
|-------------------|-----------|--------------|-----------|
| HLM <sup>a</sup>  | 1.6       | 35.4         | 75.2      |
| MRLM <sup>a</sup> | 1.8       | 496.0        | 135.2     |
| MDLM <sup>a</sup> | ~ 0.0     | 72.6         | 141.4     |

(C) In vitro half life (t<sub>1/2</sub>) (min)

|                   | <b>4c</b> | Testosterone | Midazolam |
|-------------------|-----------|--------------|-----------|
| HLM <sup>a</sup>  | 866.25    | 39.15        | 18.43     |
| MRLM <sup>a</sup> | 770.00    | 2.79         | 10.25     |
| MDLM <sup>a</sup> | ∞         | 19.09        | 9.80      |

<sup>a</sup> HLM: pooled human liver microsomes; MRLM: pooled male rat liver microsomes; MDLM: pooled male dog liver microsomes.

**Table s2.** The measured % protein binding of **4c** in plasma from various species.

|              | Mean% bound measured in plasma |              |            |
|--------------|--------------------------------|--------------|------------|
|              | <b>4c</b>                      | Testosterone | Ranitidine |
| Human plasma | 8.93                           | 95.52        | 21.16      |
| Rat plasma   | 13.57                          | 92.76        | 16.80      |
| Dog plasma   | 12.14                          | 94.01        | 20.63      |

**Table s3.** Recovery of **4c** and **4a** from urine and feces after administration of compound **4c** (5 mg/kg) to Sprague–Dawley rats.

|                  | Recovered amount ( $\mu\text{g}$ )                                  |                                                                   |                                                                     |
|------------------|---------------------------------------------------------------------|-------------------------------------------------------------------|---------------------------------------------------------------------|
|                  | <b>4c</b>                                                           | <b>4a</b>                                                         | <b>4c + 4a</b>                                                      |
| Urine            | 20.1 $\pm$ 4.8 $\mu\text{g}$<br>(1.5 $\pm$ 0.4 %) <sup>a</sup>      | 5.7 $\pm$ 2.5 $\mu\text{g}$<br>(0.4 $\pm$ 0.2 %) <sup>a</sup>     | 25.7 $\pm$ 6.8 $\mu\text{g}$<br>(1.9 $\pm$ 0.5 %) <sup>a</sup>      |
| Feces            | 582.9 $\pm$ 161.6 $\mu\text{g}$<br>(43.2 $\pm$ 12.0 %) <sup>a</sup> | 364.4 $\pm$ 39.9 $\mu\text{g}$<br>(27.0 $\pm$ 3.0 %) <sup>a</sup> | 947.3 $\pm$ 163.9 $\mu\text{g}$<br>(70.2 $\pm$ 12.1 %) <sup>a</sup> |
| Urine +<br>Feces | 603.0 $\pm$ 164.1 $\mu\text{g}$<br>(44.7 $\pm$ 12.2 %) <sup>a</sup> | 370.1 $\pm$ 38.0 $\mu\text{g}$<br>(27.4 $\pm$ 2.8 %) <sup>a</sup> | 973.0 $\pm$ 165.3 $\mu\text{g}$<br>(72.1 $\pm$ 12.2 %) <sup>a</sup> |

<sup>a</sup> The number in parenthesis indicates the percentage recovery.

**Table s4.** Clinical observation on treatment of mice with compounds **3a** and **3c**.

| Dose (mg/kg)       | Mortality            | Tremor  | Convulsion | Body jerks | Hypoactivity         | Hunched posture      | Piloerection         |
|--------------------|----------------------|---------|------------|------------|----------------------|----------------------|----------------------|
| <b>Compound 3a</b> |                      |         |            |            |                      |                      |                      |
| 300                | –                    | –       | –          | –          |                      |                      |                      |
| 500                | –                    | + (1/1) | –          | –          |                      |                      |                      |
| 750                | + (1/4)              | + (3/4) | + (3/4)    | + (1/4)    |                      |                      |                      |
| 800                | + (1/1)              | –       | –          | –          |                      |                      |                      |
| 1000               | + (1/1)              | –       | –          | –          |                      |                      |                      |
| <b>Compound 3c</b> |                      |         |            |            |                      |                      |                      |
| 300                | –                    | –       | –          | –          | –                    | –                    | –                    |
| 600                | –                    | –       | –          | –          | –                    | –                    | –                    |
| 900                | –                    | + (3/3) | –          | –          | + (3/3) <sup>a</sup> | + (3/3) <sup>a</sup> | + (3/3) <sup>a</sup> |
| 1500               | –                    | + (1/1) | + (1/1)    | + (1/1)    | + (1/1) <sup>a</sup> | + (1/1) <sup>a</sup> | + (1/1) <sup>a</sup> |
| 2000               | + (1/1) <sup>b</sup> | + (1/1) | + (1/1)    | + (1/1)    | + (1/1)              | + (1/1)              | + (1/1)              |

<sup>a</sup> The clinical sign was observed till to the second day after dosing.

<sup>b</sup> This animal was found dead in half hour later after dosing.

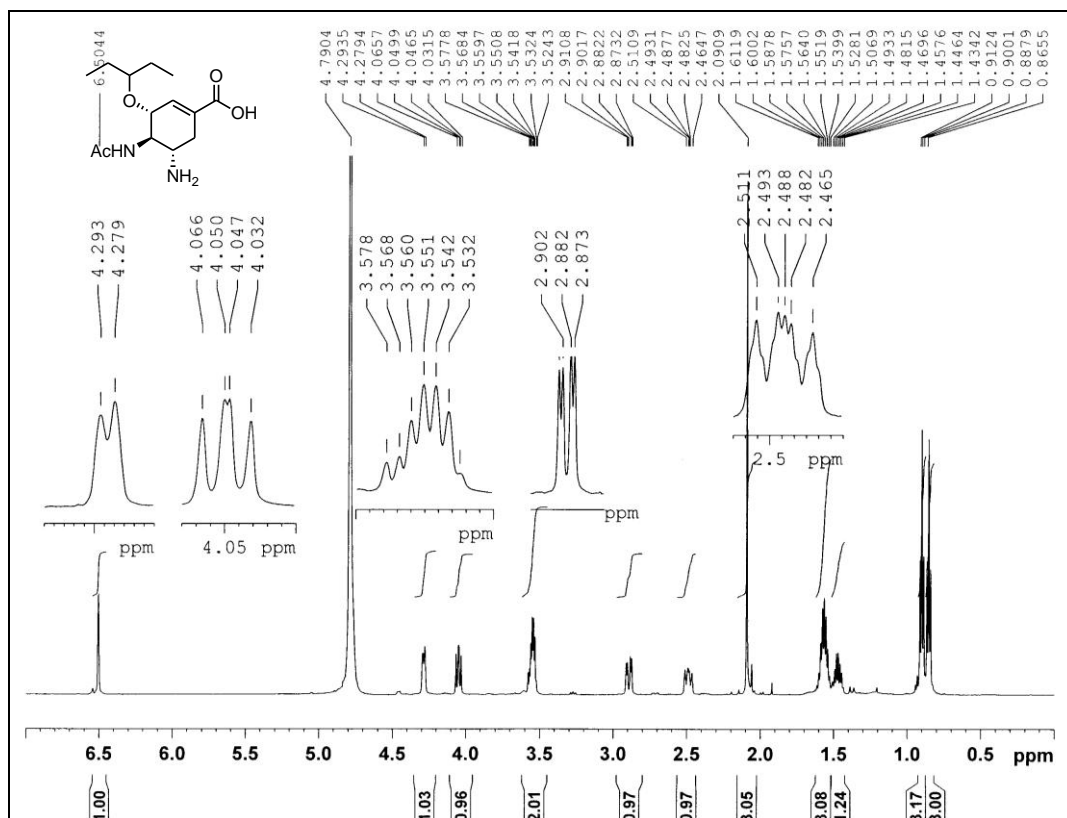

<sup>1</sup>H NMR spectrum of oseltamivir carboxylate **1a** (600 MHz, D<sub>2</sub>O)

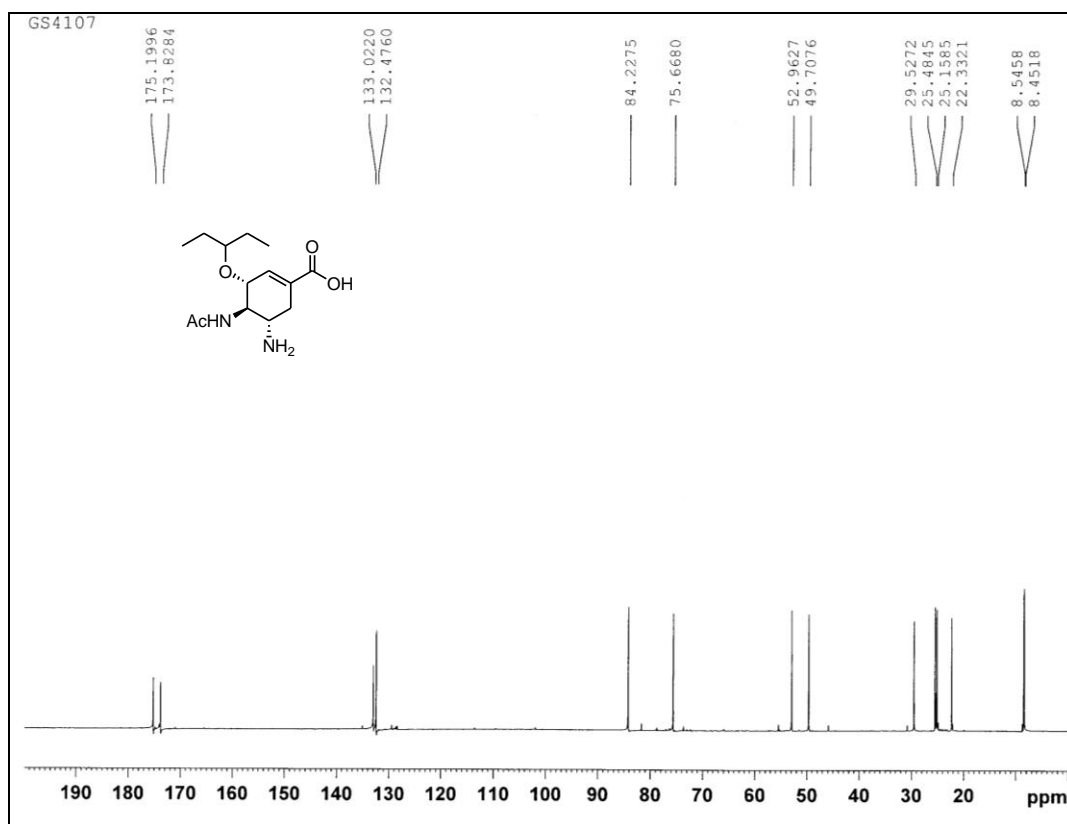

<sup>13</sup>C NMR spectrum of oseltamivir carboxylate **1a** (150 MHz, D<sub>2</sub>O)





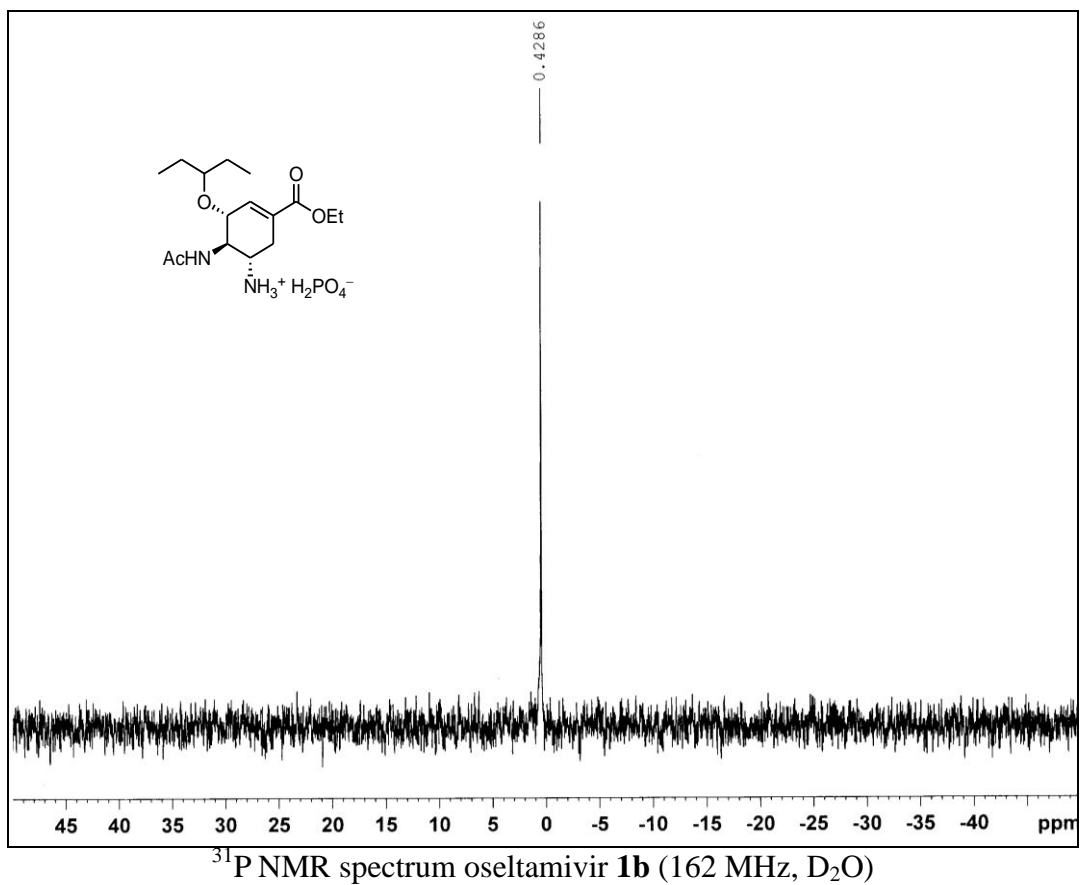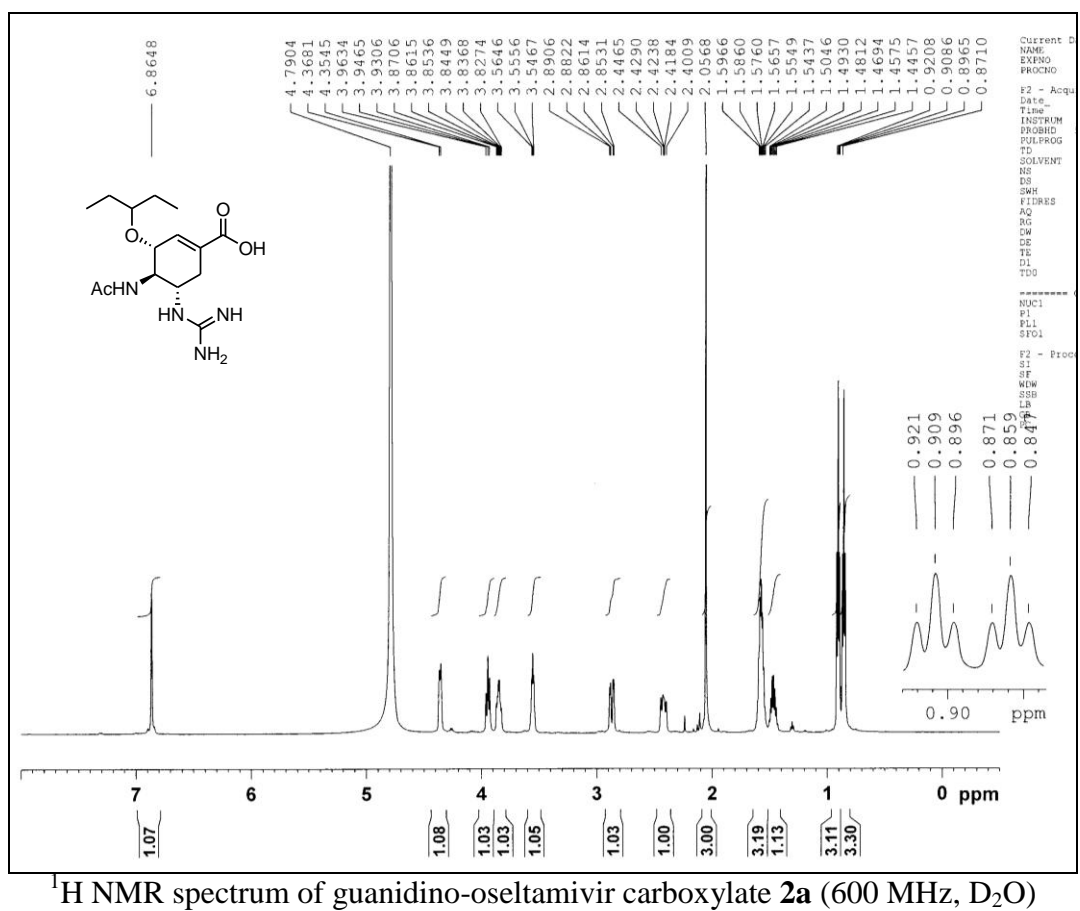

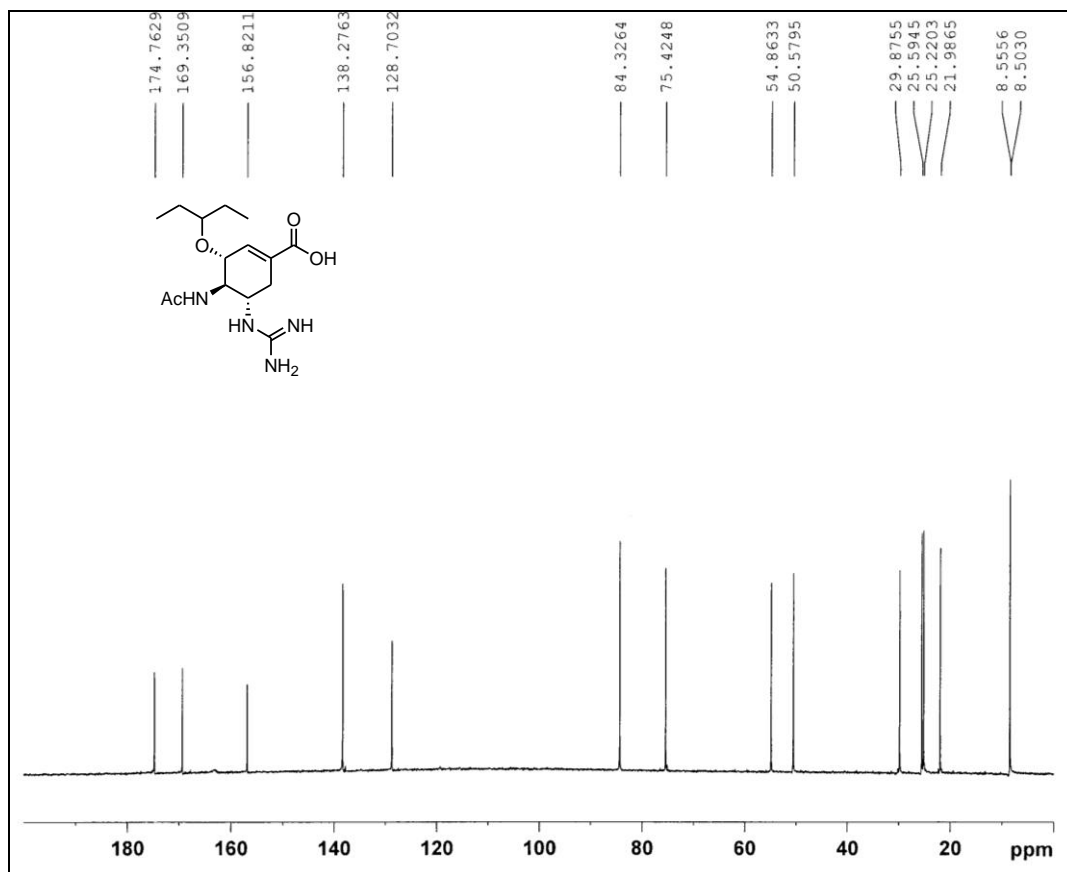

<sup>13</sup>C NMR spectrum of guanidino-oseltamivir carboxylate **2a** (150 MHz, D<sub>2</sub>O)

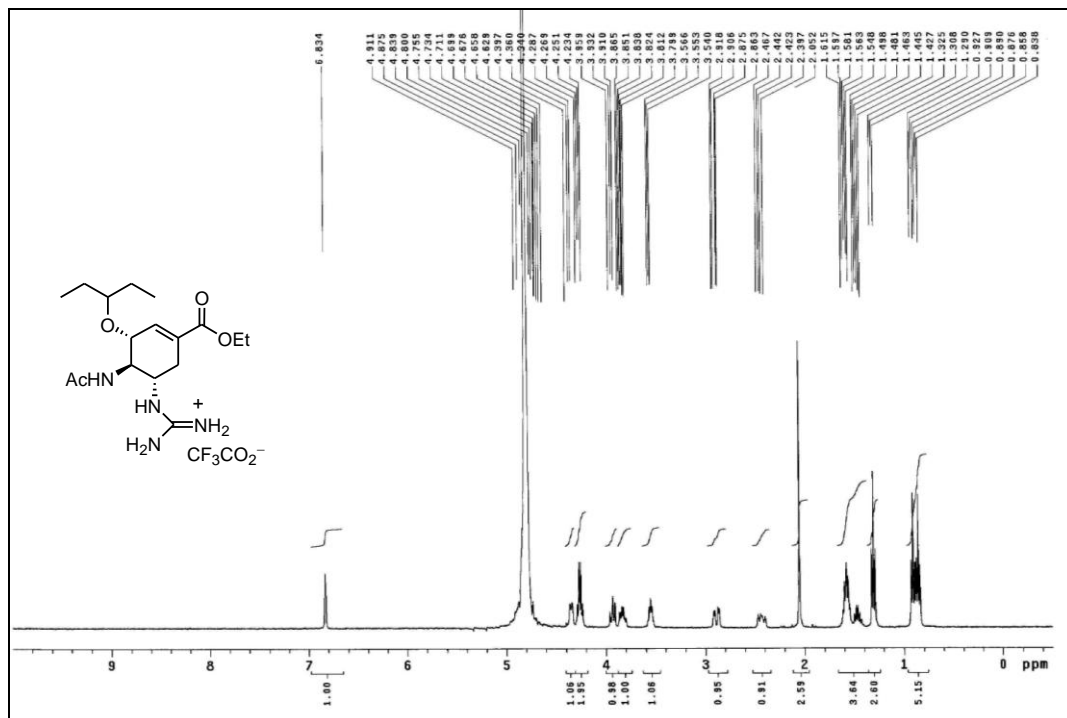

<sup>1</sup>H NMR spectrum of guanidino-oseltamivir **2b** (as the TFA salt, 400 MHz, in D<sub>2</sub>O)



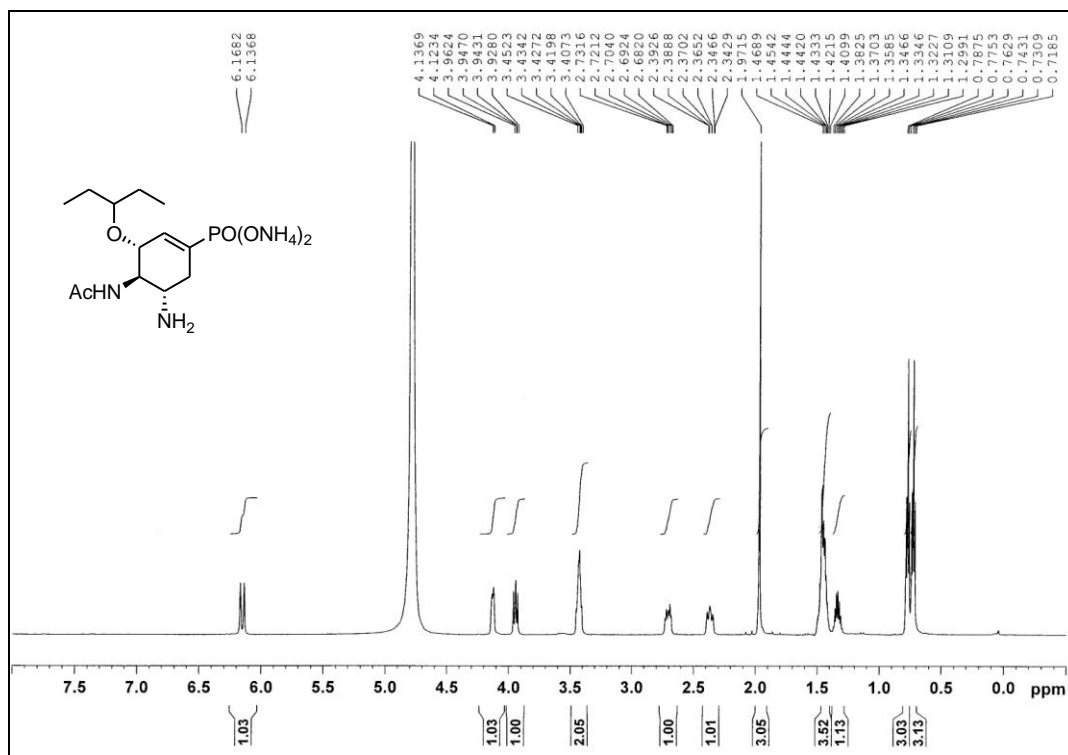

<sup>1</sup>H NMR spectrum of tamiphosphor **3a** (600 MHz, D<sub>2</sub>O)

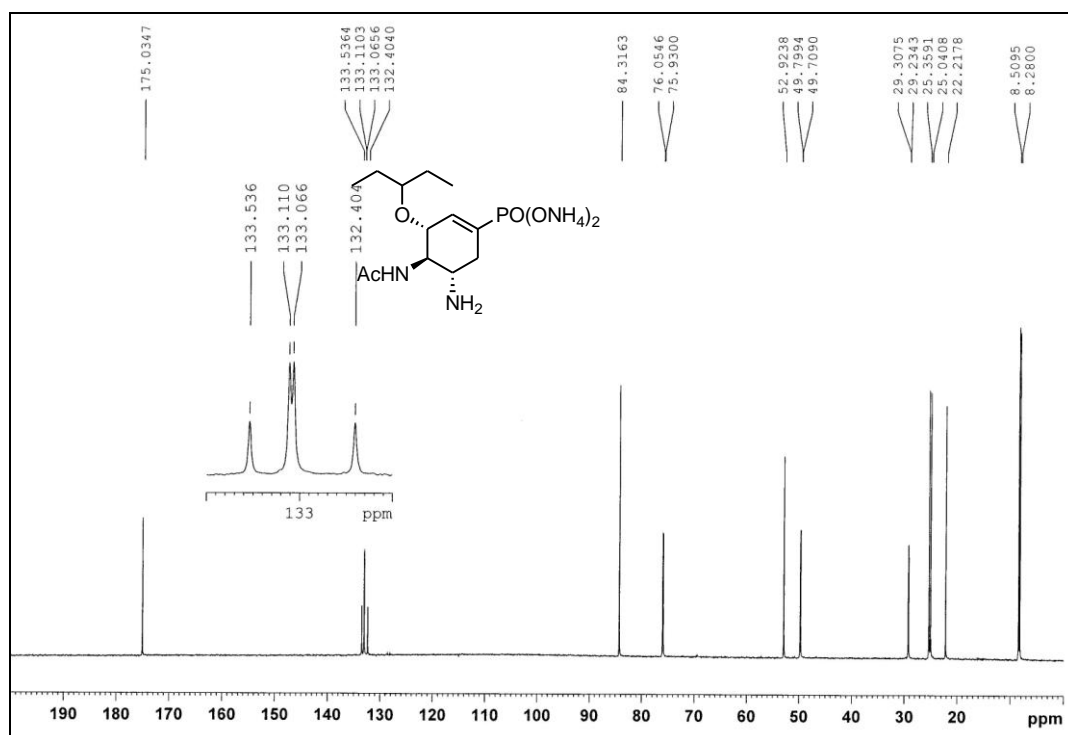

<sup>13</sup>C NMR spectrum of tamiphosphor **3a** (150 MHz, D<sub>2</sub>O)

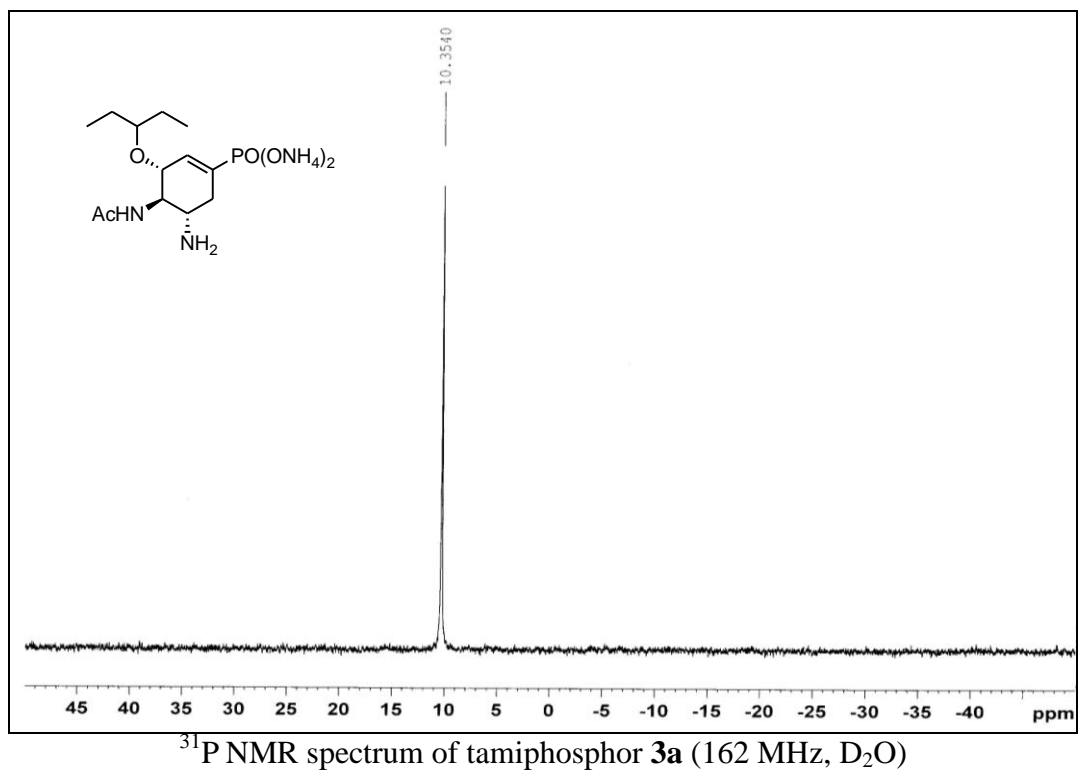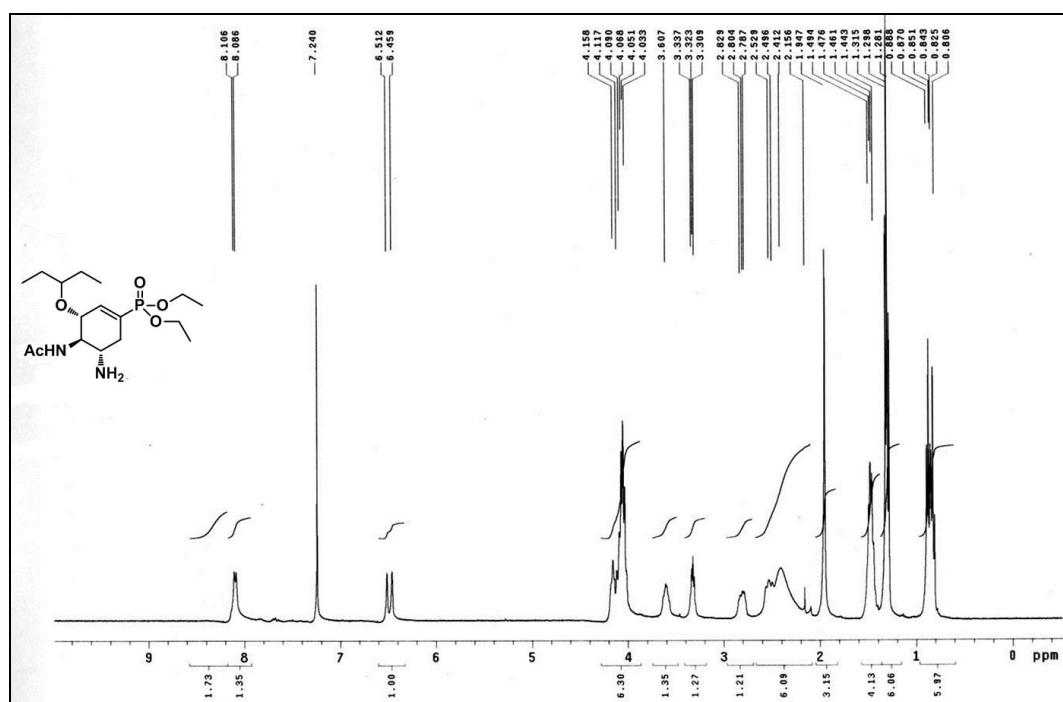

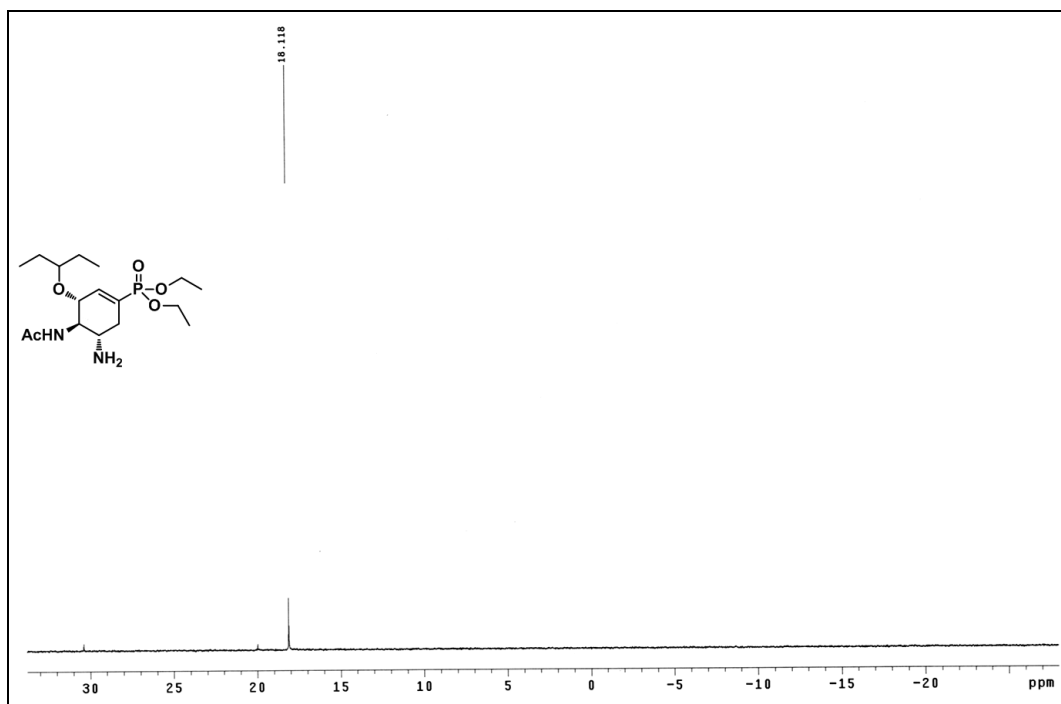

$^{31}\text{P}$  NMR spectrum of tamiphosphor diethyl ester **3b** (162 MHz, in  $\text{CDCl}_3$ )

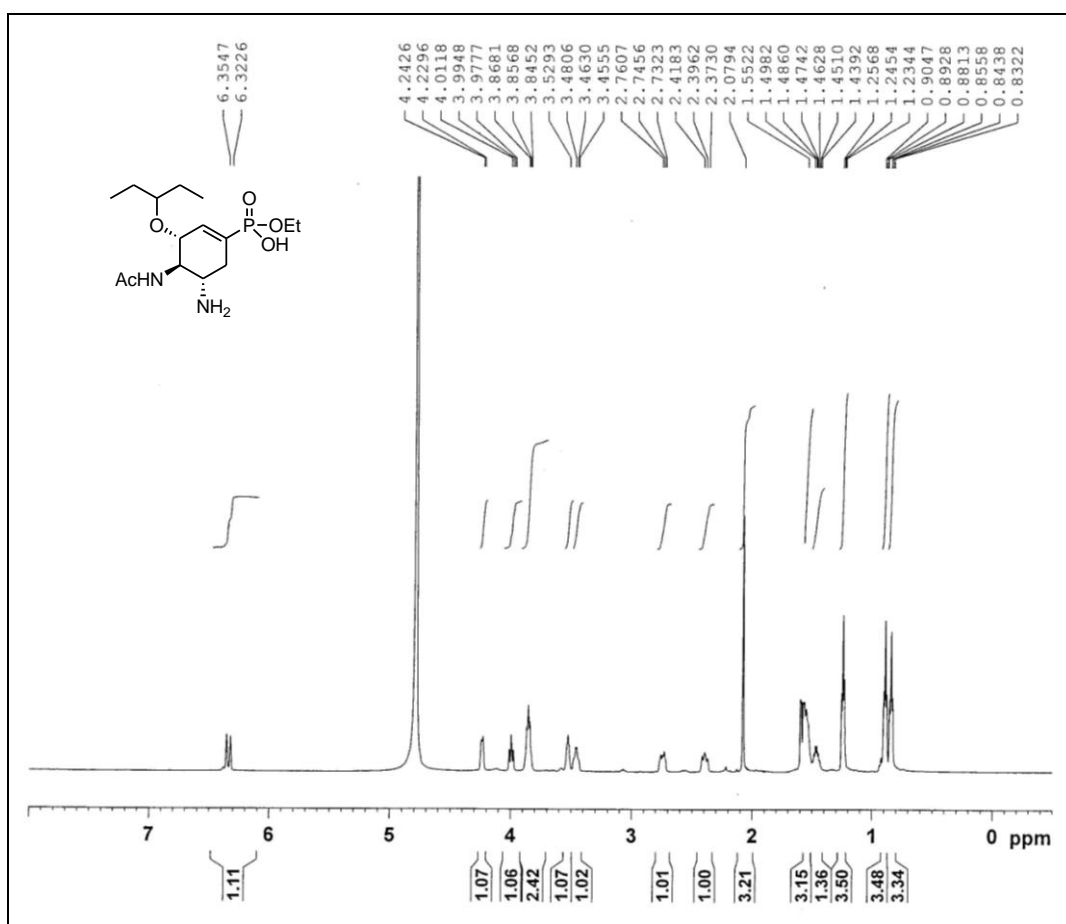

$^1\text{H}$  NMR spectrum of tamiphosphor monoethyl ester **3c** (600 MHz,  $\text{D}_2\text{O}$ )

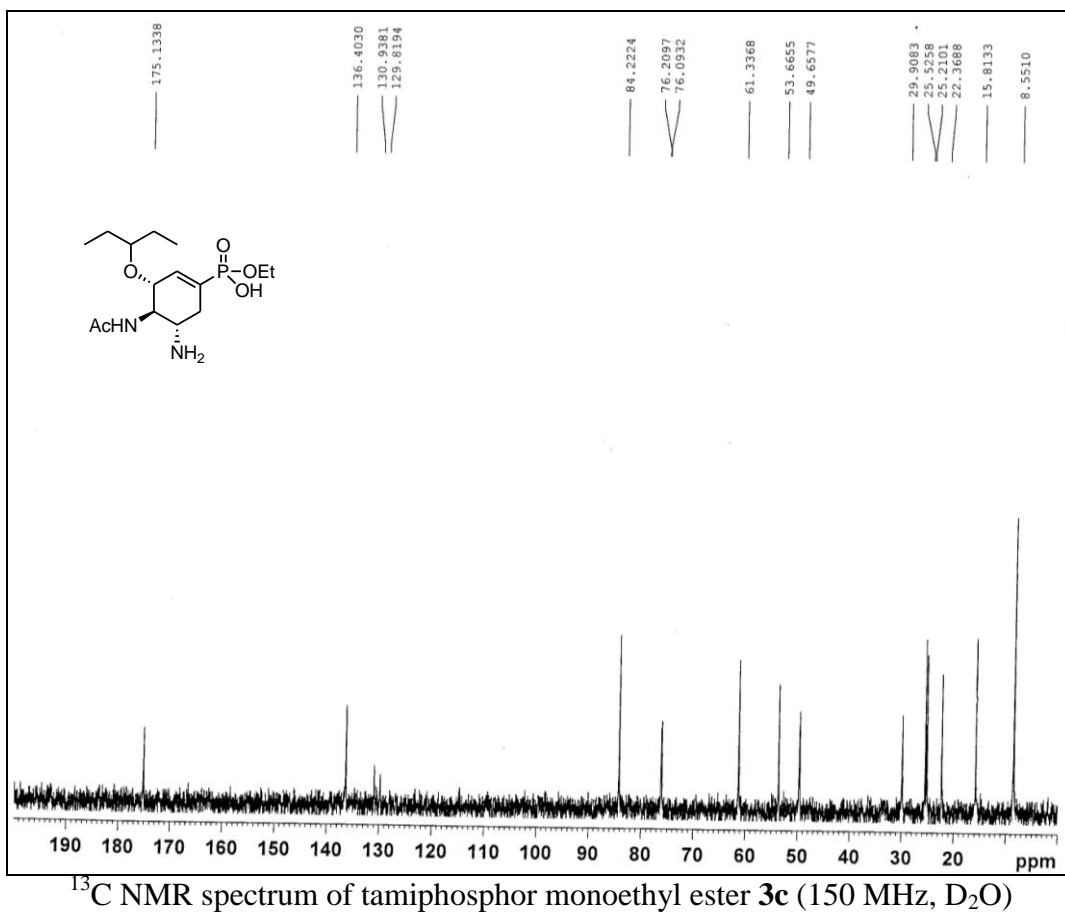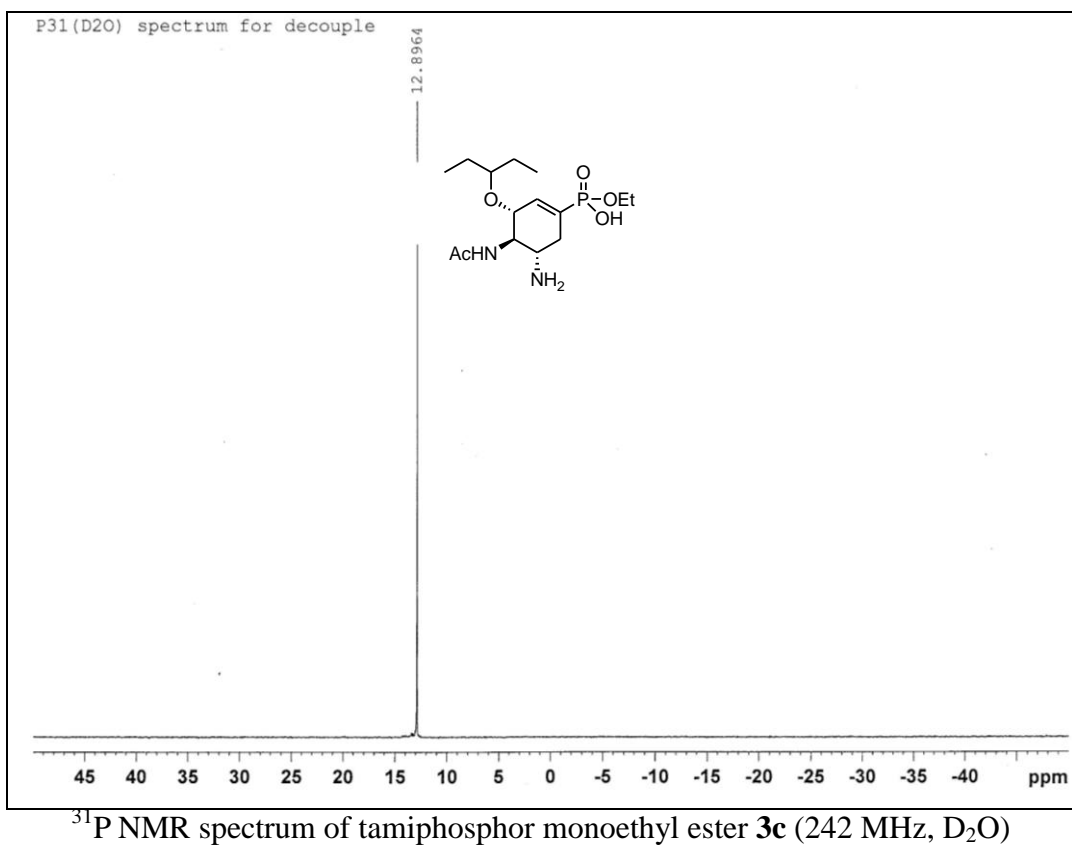

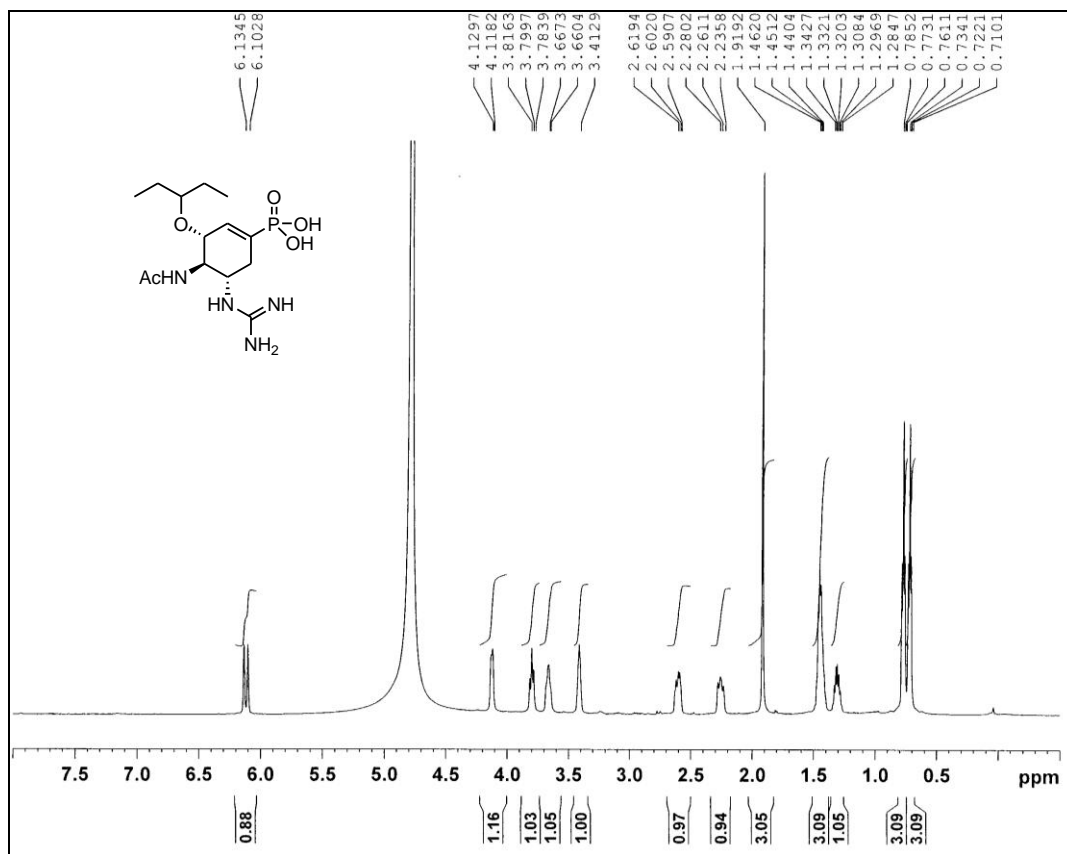

<sup>1</sup>H NMR spectrum of guanidino-tamiphosphor **4a** (600 MHz, D<sub>2</sub>O)

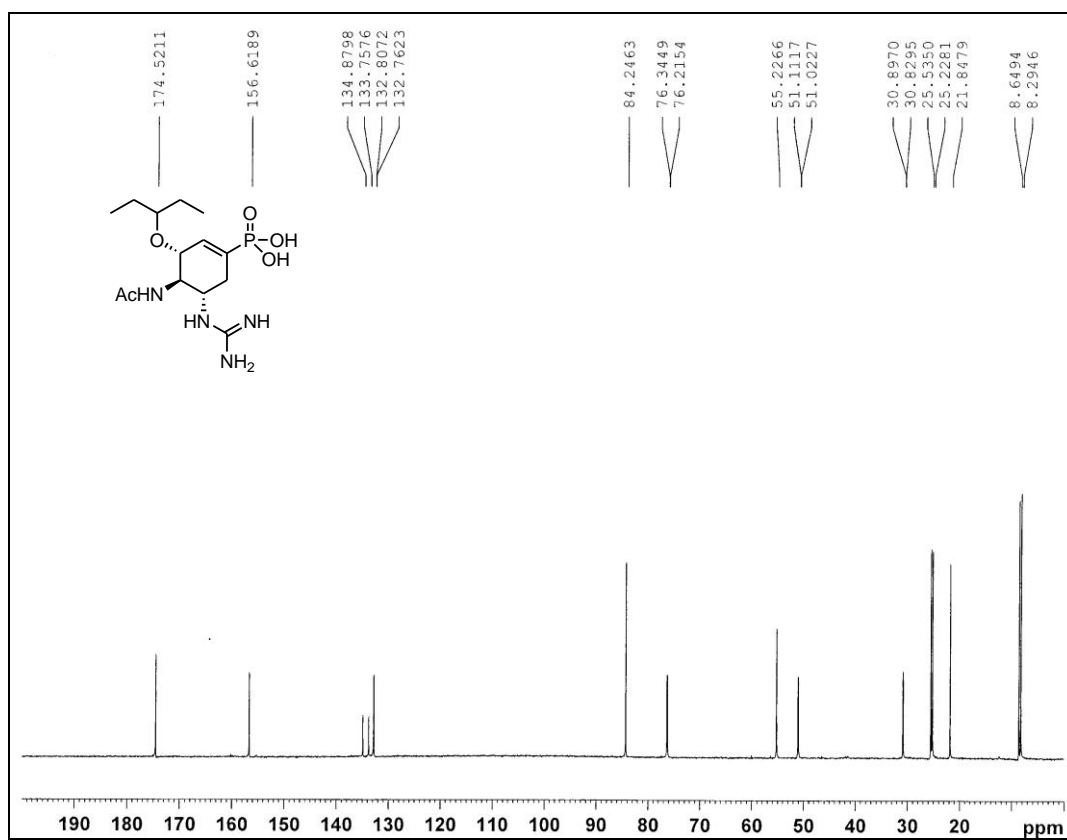

<sup>13</sup>C NMR spectrum of guanidino-tamiphosphor **4a** (150 MHz, D<sub>2</sub>O)



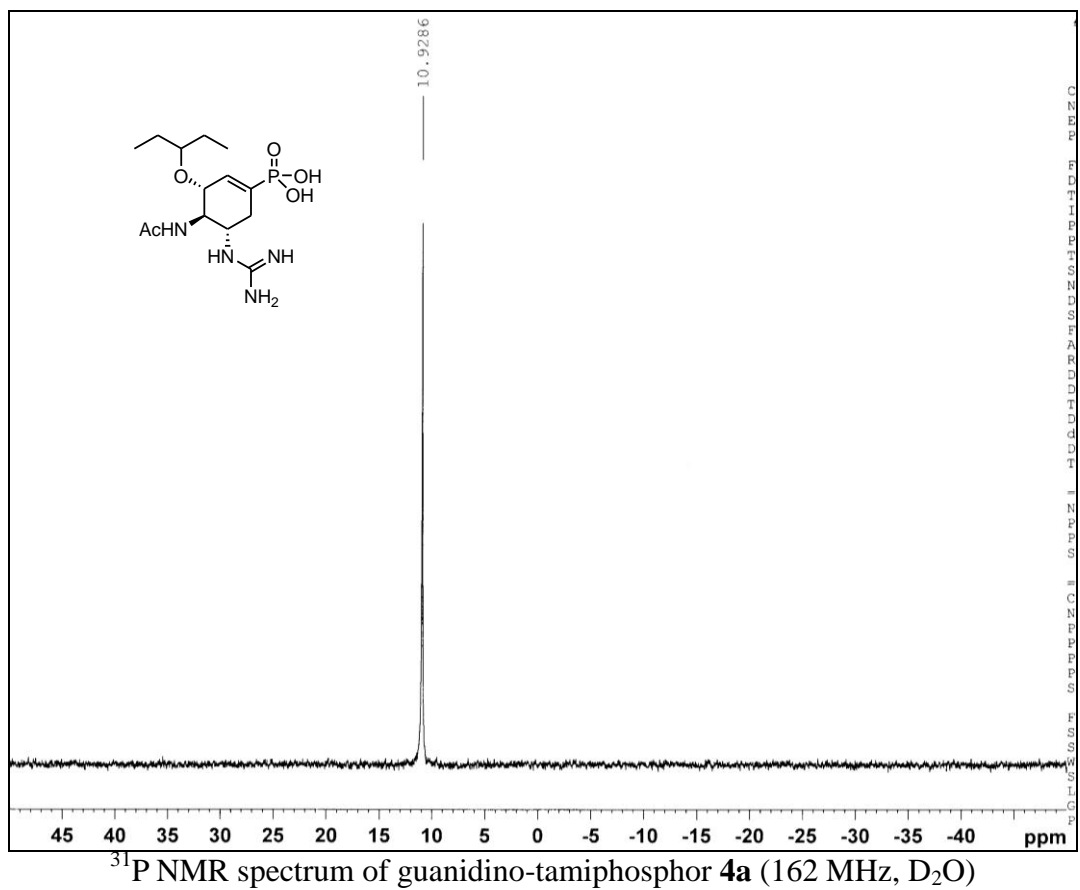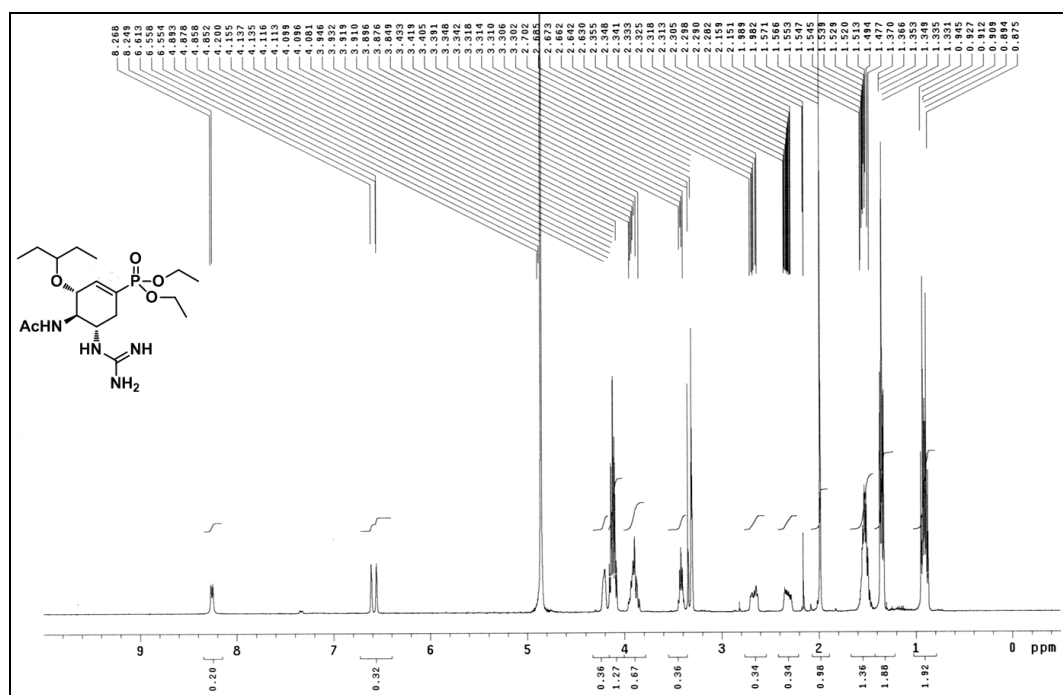

$^1\text{H}$  NMR spectrum of guanidino-tamiphosphor diethyl ester **4b** (400 MHz, in  $\text{CD}_3\text{OD}$ )

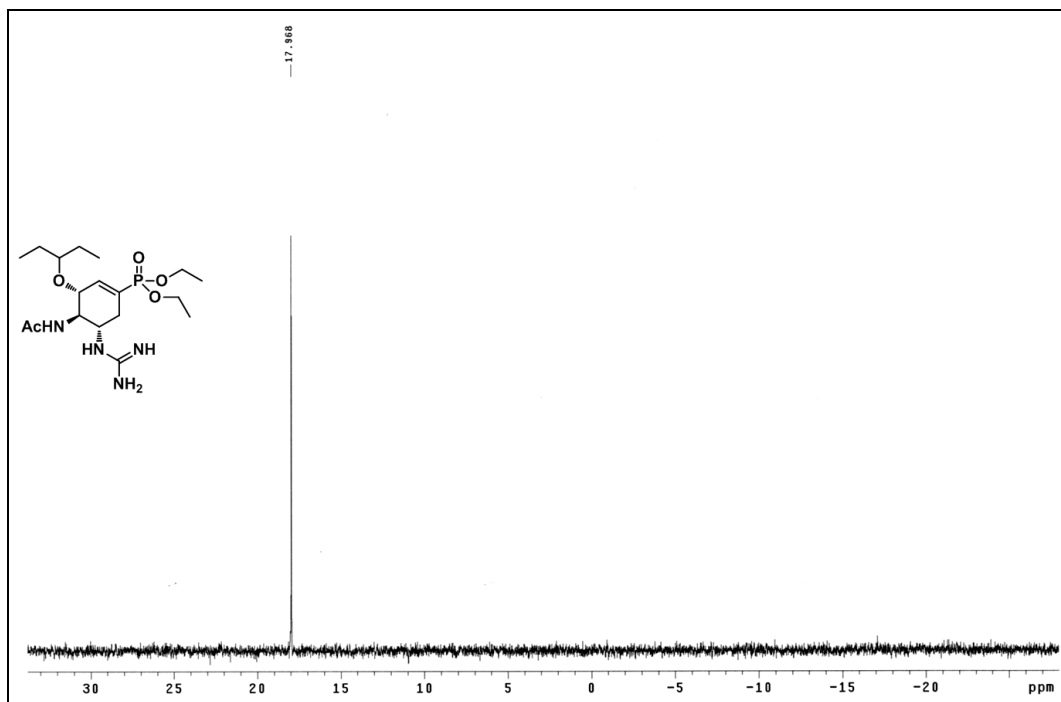

$^{31}\text{P}$  NMR spectrum of guanidino-tamiphosphor diethyl ester **4b** (162 MHz, in  $\text{CD}_3\text{OD}$ )

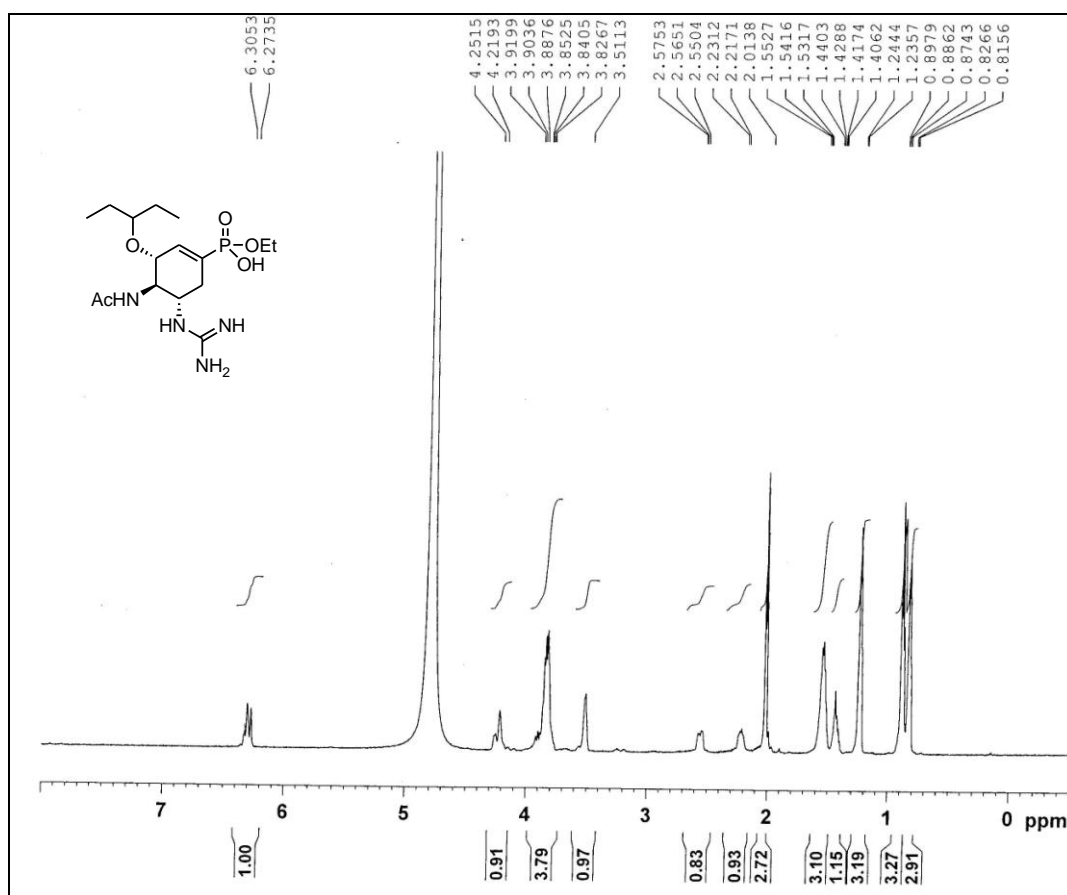

$^1\text{H}$  NMR spectrum of guanidino-tamiphosphor monoethyl ester **4c** (600 MHz,  $\text{D}_2\text{O}$ )

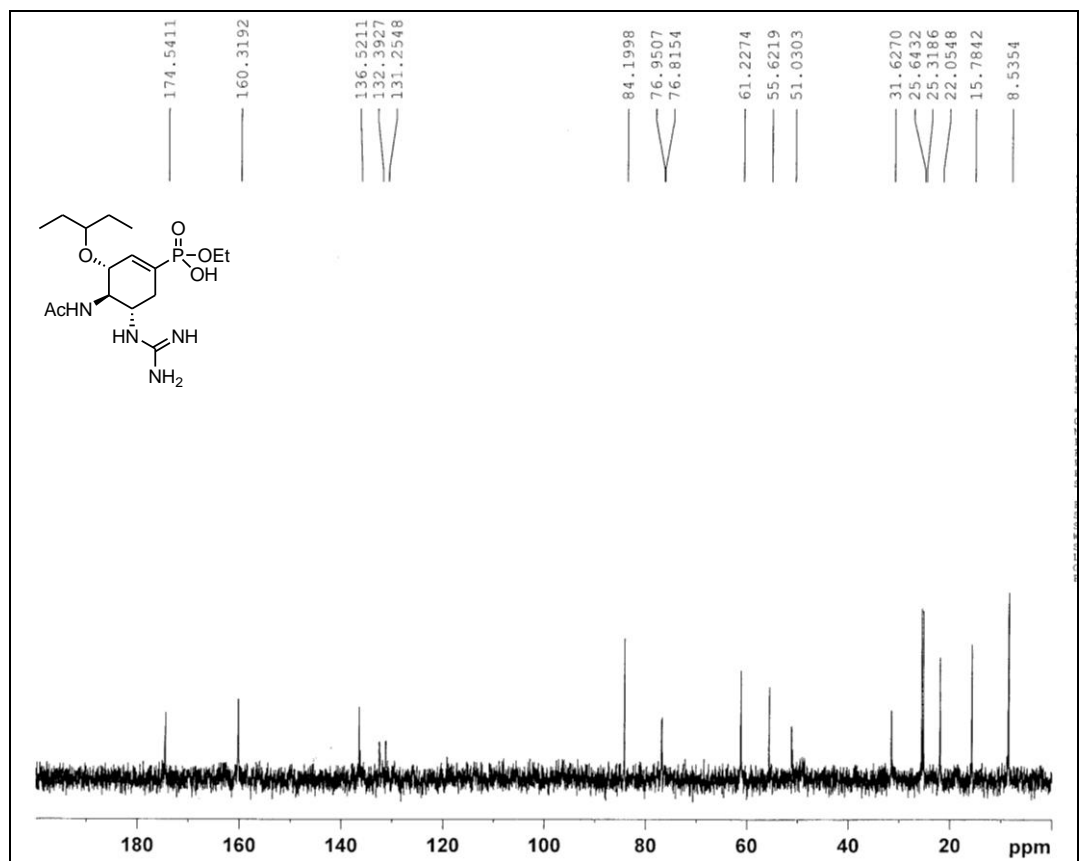

$^{13}\text{C}$  NMR spectrum of guanidino-tamiphosphor monoethyl ester **4c** (150 MHz,  $\text{D}_2\text{O}$ )
